# Supplementary material
Source: publisher figshare collection journal article supplement (https://acs.figshare.com/ndownloader/files/24955576)
Supplement: Supplementary file 1 [file 24955576]

# Theoretical Investigation of a Vital Step in the Gas-phase Formation of Interstellar Ammonia:

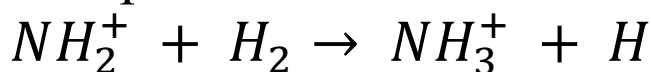

Salvi Mohandas<sup>1</sup>, Raghunath O. Ramabhadran<sup>2\*</sup>, and S. Sunil Kumar<sup>1\*</sup>

<sup>1</sup>Department of Physics and Center for Atomic, Molecular, and Optical Sciences & Technologies, Indian Institute of Science Education and Research (IISER) Tirupati, Tirupati 517507, Andhra Pradesh, India

<sup>2</sup>Department of Chemistry and Center for Atomic, Molecular, and Optical Sciences & Technologies, Indian Institute of Science Education and Research (IISER) Tirupati, Tirupati 517507, Andhra Pradesh, India

## List of figures and tables

|                   |                                                                                                                                                                                                           |     |
|-------------------|-----------------------------------------------------------------------------------------------------------------------------------------------------------------------------------------------------------|-----|
| <b>Figure S1.</b> | Transition state geometries determined in different methods/levels of theory                                                                                                                              | S3  |
| <b>Table S1.</b>  | Transition state geometries in their z-matrix format computed in different methods/ levels of theory                                                                                                      | S3  |
| <b>Table S2.</b>  | The geometries of species in their z-matrix employed for rate calculation                                                                                                                                 | S4  |
| <b>Table S3.</b>  | The geometries of species in their z-matrix (different spin state)                                                                                                                                        | S4  |
| <b>Table S4.</b>  | The electronic energy, zero-point energy of the H <sub>2</sub> molecule (singlet) in different levels of theory                                                                                           | S6  |
| <b>Table S5.</b>  | The electronic energy, zero-point energy of the NH <sub>2</sub> <sup>+</sup> (triplet) molecule in different levels of theory                                                                             | S6  |
| <b>Table S6.</b>  | The electronic energy, zero-point energy of the transition state (triplet) in different levels of theory                                                                                                  | S7  |
| <b>Table S7.</b>  | The electronic energy, zero-point energy of the NH <sub>3</sub> <sup>+</sup> (doublet) product molecule in different levels                                                                               | S7  |
| <b>Table S8.</b>  | The electronic energy including the zero-point energy of all the species computed in MP2(FU) level of theory in different basis sets                                                                      | S8  |
| <b>Figure S2.</b> | The electronic energy diagram including the zero-point energy of all the species computed in MP2(FU) level of theory in different basis sets                                                              | S8  |
| <b>Table S9.</b>  | The electronic energy, zero-point energy of the NH <sub>2</sub> <sup>+</sup> (singlet), transition state (singlet) and product NH <sub>2</sub> <sup>+</sup> (quadruplet) molecule computed MP2(FU) method | S9  |
| <b>Table S10.</b> | Zero-point-corrected energies of species involved in the reaction in different spin state                                                                                                                 | S9  |
| <b>Table S11.</b> | The normal modes of vibration of the transition state in different levels of theory                                                                                                                       | S9  |
| <b>Table S12.</b> | The normal modes of vibration of the H <sub>2</sub> molecule in different levels of theory                                                                                                                | S10 |
| <b>Table S13.</b> | The normal modes of vibration of the NH <sub>2</sub> <sup>+</sup> reactant molecule in different levels of theory                                                                                         | S10 |

|                   |                                                                                                                                                                                                                             |     |
|-------------------|-----------------------------------------------------------------------------------------------------------------------------------------------------------------------------------------------------------------------------|-----|
| <b>Table S14.</b> | The normal modes of vibration of the $\text{NH}_2^+\text{H}_2$ reactant complex in different levels of theory                                                                                                               | S10 |
| <b>Table S15.</b> | The normal modes of vibration of the $\text{NH}_3^+\text{H}$ product complex in different levels of theory                                                                                                                  | S11 |
| <b>Figure S3.</b> | The minimum energy path (IRC) computed using MP2(FC) and B3-LYP levels of theory                                                                                                                                            | S11 |
| <b>Table S16.</b> | The normal modes of vibration of the $\text{NH}_3^+$ product in different levels of theory                                                                                                                                  | S11 |
| <b>Table S17.</b> | The normal modes of vibration determined in MP2/ aug-cc-pVTZ method/level of theory for reactant, transition state and product                                                                                              | S12 |
| <b>Table S18.</b> | The activation energy in terms absolute electronic energy and electronic energy including the zero-point energy computed using different levels of theory                                                                   | S12 |
| <b>Table S19.</b> | The activation energy in terms absolute electronic energy and electronic energy including the zero-point energy computed MP2(FU) levels of theory in different basis set                                                    | S12 |
| <b>Table S20.</b> | The activation energy in terms absolute electronic energy and electronic energy including the zero-point energy computed MP2(FC) levels of theory in different basis set                                                    | S12 |
| <b>Table S21.</b> | The activation energy in terms absolute electronic energy and electronic energy including the zero-point energy computed CCSD(FU) levels of theory in different basis set                                                   | S13 |
| <b>Table S22.</b> | The activation energy in terms absolute electronic energy and electronic energy including the zero-point energy computed CCSD(FC) levels of theory in different basis set                                                   | S13 |
| <b>Table S23.</b> | Activation energies computed in CCSD(T) methods with and without core electron contributions in aug-cc-pV5Z (SP calculation)                                                                                                | S13 |
| <b>Table S24.</b> | The activation energy ( $E_a$ ) in kJ/mol from CBS electronic energy and CBS electronic energy including the zero-point energy from the respective optimized geometry.                                                      | S13 |
| <b>Figure S4.</b> | The activation energy variation along the IRC is plotted before and after smoothening computed at MP2(FU)/aug-cc-pVTZ level of theory.                                                                                      | S14 |
| <b>Figure S5.</b> | The frequency variation along IRC (a) before and (b) after smoothening. The different modes of frequencies are computed at MP2(FU)/aug-cc-pVTZ level of theory.                                                             | S14 |
| <b>Table S25.</b> | Rate coefficients at different temperature with transition-state theory with and without Wigner-tunneling correction and variational transition-state theory with Wigner-tunneling correction at MP2(FU)/ aug-cc-pVTZ level | S14 |
| <b>Figure S6.</b> | The rate constant variation with temperature at MP2 level of theory in three basis sets(aug-cc-pVDZ,TZ and QZ)                                                                                                              | S15 |
| <b>Figure S7.</b> | The rate constant variation with temperature at MP2(FU) level of theory in three basis sets(aug-cc-pVDZ,TZ and QZ)                                                                                                          | S16 |
| <b>Figure S8.</b> | The rate constant variation with temperature at CCSD(FU) level of theory in three basis sets(aug-cc-pVDZ,TZ and QZ)                                                                                                         | S16 |
| <b>Table S26.</b> | The value of vibrational scaling factors used for different levels of theory and corresponding basis set                                                                                                                    | S17 |

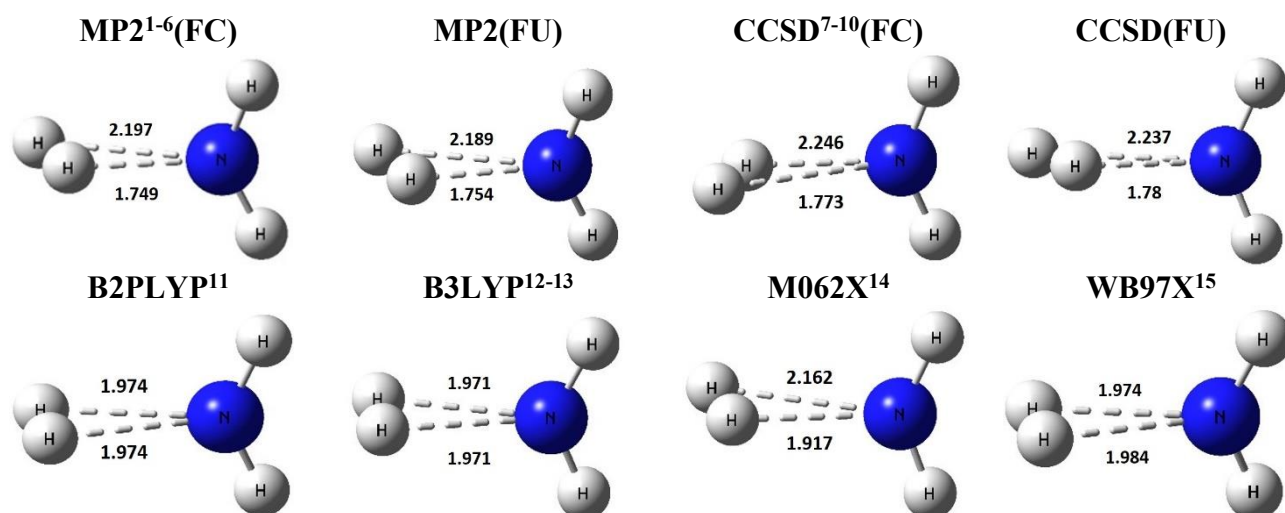

**Figure S1.** Transition state geometries determined in different methods/levels of theory performed using aug-cc-pVTZ<sup>16</sup> basis set. The bond distances between the nitrogen atom and the two hydrogen atoms in the H<sub>2</sub> molecule are shown.

**Table S1.** Transition state geometries in their z-matrix format determined in different methods/levels of theory performed using aug-cc-pVTZ basis set. The labels are according to the configuration as shown below for a transition state. In the representation ‘R’ corresponds to bond distance, ‘A’ angle and ‘D’ for the dihedral angle between the following numbered atoms in the molecule.

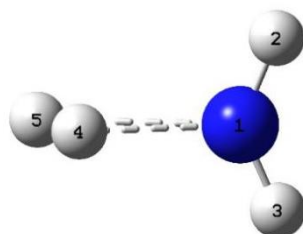

| MP2    |            | MP2(FU) |             | CCSD  |             | CCSD(FU)         |            |
|--------|------------|---------|-------------|-------|-------------|------------------|------------|
| R12    | = 1.0246   | R12     | = 1.02109   | R12   | = 1.0270    | R12              | = 1.0232   |
| R13    | = 1.0246   | R13     | = 1.02109   | R13   | = 1.0270    | R13              | = 1.0232   |
| A213   | = 134.4520 | A213    | = 134.5973  | A213  | = 135.86652 | A213             | = 136.0150 |
| R14    | = 1.7493   | R14     | = 1.7544    | R14   | = 1.7734    | R14              | = 1.78     |
| A214   | = 112.578  | A214    | = 112.5012  | A214  | = 111.9077  | A214             | = 111.8269 |
| D3214  | = 172.1074 | D3214   | = 171.97189 | D3214 | = 172.7684  | D3214            | = 172.6079 |
| R45    | = 0.7726   | R45     | = 0.7720    | R45   | = 0.7766    | R45              | = 0.7761   |
| A145   | = 15.6883  | A145    | = 114.377   | A145  | = 118.0589  | A145             | = 116.5280 |
| D2145  | = 93.047   | D2145   | = 93.0896   | D2145 | = 92.7111   | D2145            | = 92.7616  |
| B2PLYP |            | B3LYP   |             | M062X |             | $\omega$ – B97XD |            |
| R12    | = 1.0264   | R12     | = 1.02886   | R12   | = 1.0282    | R12              | = 1.0262   |
| R13    | = 1.0264   | R13     | = 1.02886   | R13   | = 1.0284    | R13              | = 1.0262   |
| A213   | = 133.47   | A213    | = 131.6673  | A213  | = 136.7651  | A213             | = 133.0832 |
| R14    | = 1.9741   | R14     | = 1.9706    | R14   | = 1.9167    | R14              | = 1.9671   |
| A214   | = 112.7862 | A314    | = 113.6530  | A314  | = 110.4209  | A314             | = 109.8185 |
| D3214  | = 167.7017 | D2314   | = 167.45146 | D2314 | = 70.2769   | D2314            | = 166.9207 |
| R45    | = 0.7758   | R45     | = 0.7845    | R45   | = 0.7692    | R45              | = 0.7801   |
| A145   | = 78.7120  | A145    | = 78.5392   | A145  | = 97.9696   | A145             | = 79.4513  |
| D2145  | = 94.8261  | D2145   | = 95.1029   | D2145 | = 86.2075   | D2145            | = 79.0124  |

**Table S2.** The geometries of species in their z-matrix format determined in MP2 method/level of theory performed using aug-cc-pVTZ basis set. The corresponding spin states are given in bracket.

| $H_2(0)$ |   |              | $NH_2^+(3)$ |   |              |
|----------|---|--------------|-------------|---|--------------|
| R12      | = | 0.73743800   | R12         | = | 1.02840899   |
|          |   |              | R13         | = | 1.02840899   |
|          |   |              | A213        | = | 150.38348614 |
| RX(3)    |   |              | TS(3)       |   |              |
| R12      | = | 1.02664521   | R12         | = | 1.02458448   |
| R13      | = | 1.02664521   | R13         | = | 1.02458448   |
| A213     | = | 146.39325042 | A213        | = | 134.45207276 |
| R14      | = | 2.38897159   | R14         | = | 1.74936311   |
| A214     | = | 106.59117269 | A214        | = | 112.57997132 |
| D3214    | = | 170.62104068 | D3214       | = | 172.10740181 |
| R45      | = | 0.74621400   | R45         | = | 0.77245688   |
| A145     | = | 81.01482394  | A145        | = | 115.68828816 |
| D2145    | = | 92.70025329  | D2145       | = | 93.04698099  |
| PX(3)    |   |              | $NH_3^+(2)$ |   |              |
| R12      | = | 1.01944093   | R12         | = | 1.01971013   |
| R13      | = | 1.01944014   | R13         | = | 1.01970929   |
| A213     | = | 119.68457493 | A213        | = | 120.00003747 |
| R14      | = | 1.02557000   | R14         | = | 1.01971013   |
| A214     | = | 120.15769466 | A214        | = | 119.99996629 |
| D3214    | = | 179.99993538 | D3214       | = | 180.00000000 |
| R15      | = | 2.97467000   |             |   |              |
| A415     | = | 0.00017667   |             |   |              |
| D2415    | = | 161.56508364 |             |   |              |

**Table S3.** The geometry of the reactant,  $NH_2^+$ , the product,  $NH_3^+$  and the transition state, TS in z-matrix format determined in MP2 method/level of theory using aug-cc-pVTZ basis set. The corresponding spin states are given in bracket.

| $NH_2^+(1)$ |   |          | $NH_3^+(4)$ |   |              |
|-------------|---|----------|-------------|---|--------------|
| R12         | = | 1.0427   | R12         | = | 1.0449       |
| R13         | = | 1.0427   | R13         | = | 1.0248       |
| A213        | = | 107.5252 | A213        | = | 157.0139     |
|             |   |          | R14         | = | 2.6656       |
|             |   |          | A214        | = | 2.7960       |
|             |   |          | D3214       | = | 179.88585688 |
| TS (1)      |   |          |             |   |              |
| R12         | = | 1.0339   |             |   |              |
| R13         | = | 1.0339   |             |   |              |
| A213        | = | 105.9851 |             |   |              |
| R14         | = | 1.1016   |             |   |              |
| A314        | = | 99.4489  |             |   |              |
| D2314       | = | 102.7564 |             |   |              |
| R45         | = | 0.8673   |             |   |              |
| A145        | = | 179.9993 |             |   |              |
| D2145       | = | 37.4486  |             |   |              |

Cartesian coordinates of the transition state (MP2<sup>1-6</sup>/aug-cc-pVTZ<sup>7</sup>)

|   |             |             |             |
|---|-------------|-------------|-------------|
| N | 0.28221700  | 0.00000000  | -0.00083800 |
| H | 0.67789000  | 0.94470700  | -0.02813100 |
| H | 0.67789000  | -0.94470700 | -0.02813100 |
| H | -1.43365100 | 0.00000000  | 0.33985000  |
| H | -1.89764800 | 0.00000000  | -0.27772300 |

Cartesian coordinates of the reactant  $NH_2^+$  (MP2/aug-cc-pVTZ)

|   |            |             |             |
|---|------------|-------------|-------------|
| N | 0.00000000 | 0.00000000  | 0.05841000  |
| H | 0.00000000 | 0.99425200  | -0.20443600 |
| H | 0.00000000 | -0.99425200 | -0.20443600 |

Cartesian coordinates of the reactant  $H_2$  (MP2/aug-cc-pVTZ)

|   |            |            |            |
|---|------------|------------|------------|
| H | 0.00000000 | 0.00000000 | 0.00000000 |
| H | 0.00000000 | 0.00000000 | 0.73744000 |

Cartesian coordinates for the product  $NH_3^+$  (MP2/aug-cc-pVTZ)

|   |             |             |            |
|---|-------------|-------------|------------|
| N | 0.00000000  | 0.00000000  | 0.00000000 |
| H | -0.88118200 | 0.51315400  | 0.00000000 |
| H | 0.88499500  | 0.50654800  | 0.00000000 |
| H | -0.00381400 | -1.01970300 | 0.00000000 |

Cartesian coordinates for the reactant complex (MP2/aug-cc-pVTZ)

|   |             |             |             |
|---|-------------|-------------|-------------|
| N | -0.37506600 | 0.00000000  | 0.00000000  |
| H | -0.67185700 | 0.98281000  | 0.00000000  |
| H | -0.67185700 | -0.98281000 | 0.00000000  |
| H | 1.98459000  | 0.00000000  | -0.37310700 |
| H | 1.98459000  | 0.00000000  | 0.37310700  |

Cartesian coordinates for the product complex (MP2/aug-cc-pVTZ)

|   |             |             |            |
|---|-------------|-------------|------------|
| N | 0.27054000  | 0.00000000  | 0.00000000 |
| H | 0.78269100  | 0.88145400  | 0.00000000 |
| H | 0.78268600  | -0.88145600 | 0.00000000 |
| H | -0.75503000 | 0.00000300  | 0.00000100 |
| H | -2.70413000 | 0.00000000  | 0.00000000 |

**Table S4.** The electronic energy, zero-point energy of the H<sub>2</sub> molecule (singlet spin state) in different levels of theory in computed aug-cc-pVTZ basis-set using harmonic analysis.

| Method          | Zero-point energy (kJ/mol) | Zero-point energy corrected electronic energy (kJ/mol) | Absolute electronic energy (kJ/mol) |
|-----------------|----------------------------|--------------------------------------------------------|-------------------------------------|
| <b>MP2</b>      | 27.02                      | -3031.746                                              | -3058.768                           |
| <b>MP2(FU)</b>  | 27.02                      | -3031.746                                              | -3058.768                           |
| <b>CCSD</b>     | 26.32                      | -3052.430                                              | -3078.754                           |
| <b>CCSD(FU)</b> | 26.32                      | -3052.430                                              | -3078.754                           |

**Table S5.** The electronic energy, zero-point energy of the NH<sub>2</sub><sup>+</sup> (triplet spin state) molecule in different levels of theory in computed aug-cc-pVTZ basis-set using harmonic analysis.

| Method          | Zero-point energy (kJ/mol) | Zero-point energy corrected electronic energy (kJ/mol) | Absolute electronic energy (kJ/mol) |
|-----------------|----------------------------|--------------------------------------------------------|-------------------------------------|
| <b>MP2</b>      | 45.99                      | -145323.4                                              | -145369.4                           |
| <b>MP2(FU)</b>  | 46.29                      | -145363.3                                              | -145409.6                           |
| <b>CCSD</b>     | 45.12                      | -145374.4                                              | -145419.5                           |
| <b>CCSD(FU)</b> | 45.47                      | -145414.8                                              | -145460.3                           |

**Table S6.** The electronic energy, zero-point energy of the transition state (triplet spin state) in different levels of theory in computed aug-cc-pVTZ basis-set using harmonic analysis.

| <b>Method</b>   | <b>Zero-point energy (kJ/mol)</b> | <b>Zero-point energy corrected electronic energy (kJ/mol)</b> | <b>Absolute electronic energy (kJ/mol)</b> |
|-----------------|-----------------------------------|---------------------------------------------------------------|--------------------------------------------|
| <b>MP2</b>      | 81.710                            | -148352.1                                                     | -148433.8                                  |
| <b>MP2(FU)</b>  | 82.30                             | -148392.3                                                     | -148474.6                                  |
| <b>CCSD</b>     | 80.38                             | -148425.3                                                     | -148505.7                                  |
| <b>CCSD(FU)</b> | 81.00                             | -148466.2                                                     | -148547.2                                  |

**Table S7.** The electronic energy, zero-point energy of the  $\text{NH}_3^+$  (doublet spin state) product molecule in different levels of theory in computed aug-cc-pVTZ basis-set using harmonic analysis.

| <b>Method</b>   | <b>Zero-point energy (kJ/mol)</b> | <b>Zero-point energy corrected electronic energy (kJ/mol)</b> | <b>Absolute electronic energy (kJ/mol)</b> |
|-----------------|-----------------------------------|---------------------------------------------------------------|--------------------------------------------|
| <b>MP2</b>      | 87.11                             | -147161.6                                                     | -147248.7                                  |
| <b>MP2(FU)</b>  | 87.75                             | -147205.2                                                     | -147292.9                                  |
| <b>CCSD</b>     | 86.61                             | -147211.3                                                     | -147297.9                                  |
| <b>CCSD(FU)</b> | 87.34                             | -147255.6                                                     | -147343.0                                  |

**Table S8.** The electronic energy including the zero-point energy (in kJ/mol) of all the species involved in the reaction of interest computed in MP2(FU) level of theory in different basis sets, aug-cc-pVDZ<sup>17</sup>, aug-cc-pVTZ and aug-cc-pVQZ<sup>18</sup>.

| Method   | APVDZ     | APVTZ     | APVQZ     |
|----------|-----------|-----------|-----------|
| $H_2$    | -3008.954 | -3031.743 | -3036.26  |
| $NH_2^+$ | -145221.0 | -145363.3 | -145432.2 |
| $RX$     | -148233.2 | -148398.1 | -148471.5 |
| $TS$     | -148228.3 | -148392.3 | -148466.4 |
| $PX$     | -148353.7 | -148521.4 | -148596.1 |
| $NH_3^+$ | -147039.6 | -147205.2 | -147279.8 |
| $H$      | -1311.0   | -1312.3   | -1312.6   |

(Note: RX – reactant complex, TS- transition state, PX- product complex)

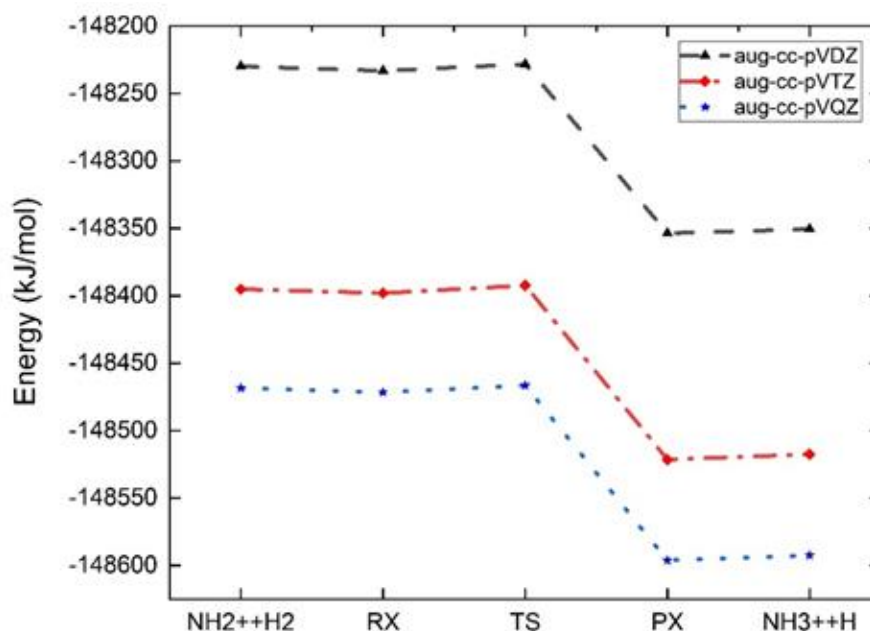

**Figure S2.** The electronic energy diagram including the zero-point energy of all the species involved in the reaction of interest computed in MP2(FU) level of theory in different basis sets, aug-cc-pVDZ, aug-cc-pVTZ and aug-cc-pVQZ.



**Table S9.** The electronic energy, zero-point energy of the  $\text{NH}_2^+$  (singlet spin state), transition state (singlet) and product  $\text{NH}_3^+$  (quadruplet) molecule computed MP2(FU) method with aug-cc-pVTZ basis-set using harmonic analysis.

| Method          | Zero-point energy (kJ/mol) | Zero-point energy corrected electronic energy (kJ/mol) | Absolute electronic energy (kJ/mol) |
|-----------------|----------------------------|--------------------------------------------------------|-------------------------------------|
| $\text{NH}_2^+$ | 48.17791838                | -145212.0503                                           | -145260.2282                        |
| TS              | 93.88261609                | -148420.4582                                           | -148514.3408                        |
| $\text{NH}_3^+$ | 51.28913545                | -146685.5752                                           | -146736.8643                        |

**Table S10.** Zero-point-corrected energies of species involved in the reaction in different spin state. The charge and spin multiplicity are given in brackets.

| Optimized in MP2/aug-cc-pVTZ | Energy (Hartree) | Energy (Hartree) |
|------------------------------|------------------|------------------|
| $\text{H}_2$                 | -1.15473 (0 1)   | -0.99965 (0 3)   |
| $\text{NH}_2^+$              | -55.35077(1 3)   | -55.29379 (1 1)  |
| $\text{H}_2 + \text{NH}_2^+$ | -56.5055         | -56.29344        |
| TS                           | -56.50433 (1 3)  | -56.51794 (1 1)  |
| $\text{NH}_3^+ + \text{H}$   | -56.55068        | -56.35088        |
| $\text{NH}_3^+$              | -56.05089 (1 2)  | -55.85109 (1 4)  |
| H                            | -0.49979 (0 2)   | -0.49979 (0 2)   |

**Table S11.** The magnitude of different frequency modes of vibration of the transition state in different levels of theory with aug-cc-pVTZ basis-set using harmonic analysis.

| Method          | Frequency ( $\text{cm}^{-1}$ ) |        |        |        |        |         |         |         |         |
|-----------------|--------------------------------|--------|--------|--------|--------|---------|---------|---------|---------|
|                 | 1                              | 2      | 3      | 4      | 5      | 6       | 7       | 8       | 9       |
| MP2             | 684.69i                        | 169.06 | 417.78 | 514    | 599.57 | 1158.63 | 3365.49 | 3596.3  | 3840.01 |
| MP2(FU)         | 668.22i                        | 186.78 | 414.16 | 518.84 | 604.58 | 1166.14 | 3400.85 | 3614.02 | 3853.3  |
| CCSD            | 601.97i                        | 166.9  | 417.92 | 499.09 | 582.76 | 1115.4  | 3331.91 | 3557.44 | 3766.7  |
| CCSD(FU)        | 584i                           | 182.05 | 414.25 | 502.93 | 587.3  | 1123.42 | 3371.15 | 3577.45 | 3783.34 |
| B2-PLYP         | 353.0i                         | 204.0  | 456.70 | 513.78 | 634.94 | 1133.59 | 3323.97 | 3551.17 | 3932.35 |
| B3-LYP          | 480.3i                         | 206.91 | 466.93 | 589.14 | 660.45 | 114.57  | 3290.53 | 3512.06 | 3844.76 |
| M06-2X          | 706.82i                        | 386.74 | 440.5  | 526.28 | 751.13 | 1087.35 | 3333.92 | 3568.33 | 3958.34 |
| $\omega$ -B97XD | 427.35i                        | 287.35 | 468.67 | 557.17 | 625.47 | 1143.88 | 3348.36 | 3576.08 | 3915.70 |

**Table S12.** The magnitude of different frequency mode of vibration of the H<sub>2</sub> molecule in different levels of theory in computed aug-cc-pVTZ basis-set using harmonic analysis

| Method    | Frequency (cm <sup>-1</sup> ) |
|-----------|-------------------------------|
| MP2       | 4517.65                       |
| MP2(FU)   | 4517.65                       |
| CCSD      | 4401.15                       |
| CCSD (FU) | 4401.15                       |

**Table S13.** The magnitude of different frequency mode of vibration of the NH<sub>2</sub><sup>+</sup> reactant molecule in different levels of theory in computed aug-cc-pVTZ basis-set using harmonic analysis

| Method    | Frequency (cm <sup>-1</sup> ) |         |         |
|-----------|-------------------------------|---------|---------|
|           | 1                             | 2       | 3       |
| MP2       | 816.38                        | 3306.45 | 3567.11 |
| MP2(FU)   | 814.62                        | 3343.67 | 3581.39 |
| CCSD      | 750.5                         | 3269.91 | 3523.62 |
| CCSD (FU) | 750.82                        | 3311.41 | 3539.09 |

**Table S14.** The magnitude of different frequency mode of vibration of the NH<sub>2</sub><sup>+</sup>H<sub>2</sub> reactant complex in different levels of theory in computed aug-cc-pVTZ basis-set using harmonic analysis.

| Method   | Frequency (cm <sup>-1</sup> ) |        |        |        |        |        |         |         |         |
|----------|-------------------------------|--------|--------|--------|--------|--------|---------|---------|---------|
|          | 1                             | 2      | 3      | 4      | 5      | 6      | 7       | 8       | 9       |
| MP2      | 154.75                        | 189.3  | 219.41 | 283.77 | 432.74 | 896.57 | 3328.36 | 3587.46 | 4363.63 |
| MP2(FU)  | 155.62                        | 199.29 | 218.23 | 290.09 | 429.09 | 901.78 | 3364.18 | 3602.69 | 4359.12 |
| CCSD     | 159.55                        | 222.42 | 222.80 | 326.96 | 419.82 | 872.94 | 3297.37 | 3547.08 | 4227.01 |
| CCSD(FU) | 160.53                        | 220.84 | 235.84 | 337.47 | 414.42 | 885.04 | 3337.62 | 3564.76 | 4216.29 |

**Table S15.** The magnitude of different frequency mode of vibration of the  $\text{NH}_3^+\text{H}$  product complex in different levels of theory in computed aug-cc-pVTZ basis-set using harmonic analysis.

| Method   | Frequency ( $\text{cm}^{-1}$ ) |        |        |        |         |         |         |         |         |
|----------|--------------------------------|--------|--------|--------|---------|---------|---------|---------|---------|
|          | 1                              | 2      | 3      | 4      | 5       | 6       | 7       | 8       | 9       |
| MP2      | 167.49                         | 241.5  | 312.55 | 855.46 | 1555.69 | 1562.15 | 3352.58 | 3537.76 | 3602.47 |
| MP2(FU)  | 183.49                         | 270.95 | 315.7  | 872.28 | 1568.39 | 1578.25 | 3385.26 | 3550.69 | 3614.59 |
| CCSD     | 171.21                         | 247.45 | 319.66 | 870.38 | 1552.54 | 1559.16 | 3323.64 | 3503.2  | 3568.6  |
| CCSD(FU) | 188.28                         | 279.64 | 322.18 | 887.48 | 1566.9  | 1577.24 | 3360.1  | 3518.41 | 3582.71 |

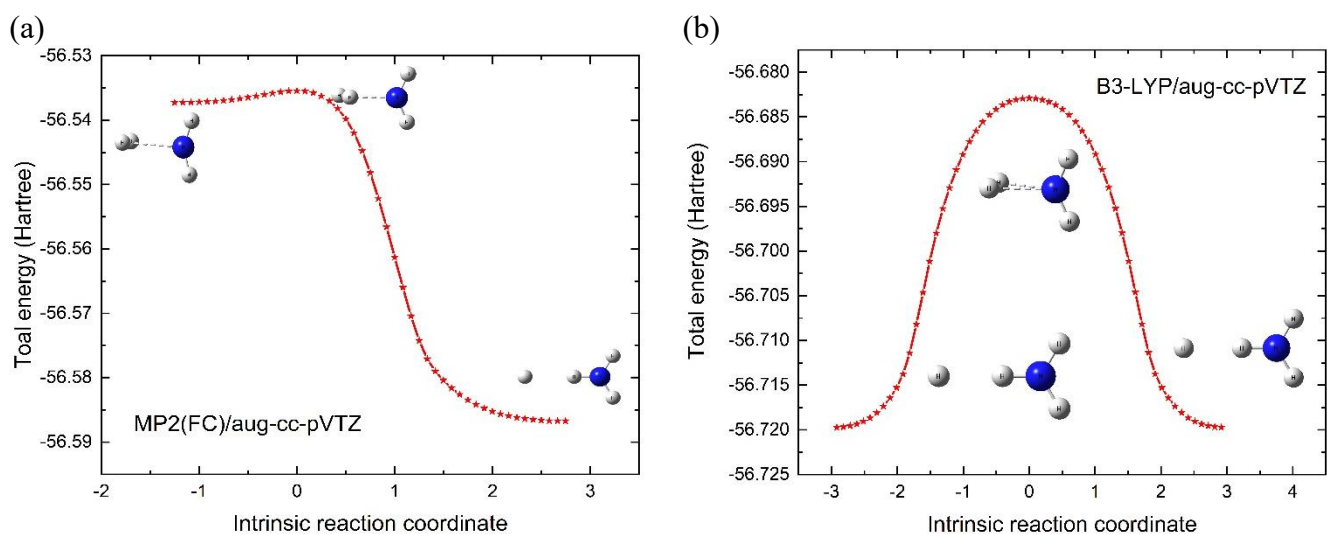

**Figure S3.** The minimum energy path (IRC) connecting the reactant complex, the transition state, and the product complex computed using MP2(FC) and B3-LYP levels of theory in aug-cc-pVTZ basis set. Nature of the species on either side of the transition state indicates that the TS does not correspond to the reaction of concern.

**Table S16.** The magnitude of different frequency mode of vibration of the  $\text{NH}_3^+$  product in different levels of theory in computed aug-cc-pVTZ basis-set using harmonic analysis.

| Method    | Frequency ( $\text{cm}^{-1}$ ) |         |         |         |         |         |
|-----------|--------------------------------|---------|---------|---------|---------|---------|
|           | 1                              | 2       | 3       | 4       | 5       | 6       |
| MP2       | 837.73                         | 1559    | 1559    | 3408.2  | 3598.9  | 3598.9  |
| MP2(FU)   | 855.05                         | 1574.94 | 1574.94 | 3439.76 | 3613.24 | 3613.24 |
| CCSD      | 852.3                          | 1555.88 | 1555.89 | 3385.36 | 3565.4  | 3565.41 |
| CCSD (FU) | 869.87                         | 1573.8  | 1573.8  | 3420.57 | 3582.06 | 3582.06 |

**Table S17.** The normal modes of vibration determined in MP2 method/level of theory using aug-cc-pVTZ basis set for reactant, transition state and product at the specified spin state.

| Species                                      | Frequency (cm <sup>-1</sup> ) |         |        |        |        |        |        |        |        |
|----------------------------------------------|-------------------------------|---------|--------|--------|--------|--------|--------|--------|--------|
|                                              | 1                             | 2       | 3      | 4      | 5      | 6      | 7      | 8      | 9      |
| NH <sub>2</sub> <sup>+</sup><br>(singlet)    | 1445.2                        | 3269.0  | 3340.  | -      | -      | -      | -      | -      | -      |
| TS<br>(singlet)                              | 1452.9i                       | 1083.9i | 1147.2 | 1253.1 | 1487.8 | 1649.4 | 3326.7 | 3408.4 | 3423.4 |
| NH <sub>3</sub> <sup>+</sup><br>(quadruplet) | 334.4                         | 465.7   | 510.4  | 723.0  | 3042.3 | 3499.3 | -      | -      | -      |

**Table S18.** The activation energy ( $E_a$ ) in kJ/mol in terms absolute electronic energy and electronic energy including the zero-point energy computed using different levels of theory in aug-cc-pVTZ basis set.

| Method   | Without ZPE | With ZPE |
|----------|-------------|----------|
| MP2      | -5.6        | 3.1      |
| MP2 (FU) | -6.3        | 2.7      |
| CCSD     | -7.4        | 1.5      |
| CCSD(FU) | -8.1        | 1.1      |

**Table S19.** The activation energy ( $E_a$ ) in kJ/mol in terms absolute electronic energy and electronic energy including the zero-point energy computed MP2(FU) levels of theory in different basis set.

| Basis set   | Without ZPE | With ZPE |
|-------------|-------------|----------|
| aug-cc-pVDZ | -7.3        | 1.7      |
| aug-cc-pVTZ | -6.3        | 2.7      |
| aug-cc-pVQZ | -7.0        | 2.0      |

**Table S20.** The activation energy ( $E_a$ ) in kJ/mol in terms absolute electronic energy and electronic energy including the zero-point energy computed MP2(FC) levels of theory in different basis set.

| Basis set   | Without ZPE | With ZPE |
|-------------|-------------|----------|
| aug-cc-pVDZ | -7.0        | 2.0      |
| aug-cc-pVTZ | -5.6        | 3.1      |
| aug-cc-pVQZ | -6.5        | 2.4      |

**Table S21.** The activation energy ( $E_a$ ) in kJ/mol in terms absolute electronic energy and electronic energy including the zero-point energy computed at CCSD(FU) levels of theory using different basis sets.

| Basis set   | Without ZPE | With ZPE |
|-------------|-------------|----------|
| aug-cc-pVDZ | -8.7        | 0.3      |
| aug-cc-pVTZ | -8.1        | 1.1      |
| aug-cc-pVQZ | -8.8        | 0.5      |

**Table S22.** The activation energy ( $E_a$ ) in kJ/mol in terms absolute electronic energy and electronic energy including the zero-point energy computed at CCSD levels of theory using different basis sets.

| Basis set   | Without ZPE | With ZPE |
|-------------|-------------|----------|
| aug-cc-pVDZ | 0.0         | 0.5      |
| aug-cc-pVTZ | 0.0         | 1.5      |

**Table S23.** Activation energies ( $E_a$ ) in kJ/mol computed in CCSD(T)<sup>19,20</sup> methods with and without core electron contributions in aug-cc-pV5Z<sup>21</sup> basis set are listed in the table. The electronic energy values are from single point energy calculations in aug-cc-pV5Z basis set. The geometry and the zero-point energy are chosen from a MP2 or CCSD method as mentioned in the table.

| Method                                              | Without ZPE | With ZPE |
|-----------------------------------------------------|-------------|----------|
| CCSD(T) <sup>1</sup> /aug-cc-pV5Z //MP2/aug-cc-pVTZ | -12.2       | -3.5     |
| CCSD(T)(FU)/aug-cc-pV5Z //MP2(FU)/aug-cc-pVTZ       | -12.8       | -3.8     |
| CCSD(T)/aug-cc-pV5Z //CCSD/aug-cc-pVTZ              | -12.0       | -3.0     |
| CCSD(T)(FU)/aug-cc-pV5Z //CCSD(FU)/aug-cc-pVTZ      | -12.5       | -3.3     |

**Table S24.** The activation energy ( $E_a$ ) in kJ/mol from CBS electronic energy and CBS electronic energy including the zero-point energy from the respective optimized geometry. CBS exponential extrapolation is carried out for electronic energies from SP calculation at CCSD(T) level of theory with aug-cc-pVTZ, QZ, 5Z and 6Z basis sets for the geometries specified in the table.

| Basis set                              | Without ZPE | With ZPE |
|----------------------------------------|-------------|----------|
| CCSD(T)/CBS// MP2/aug-cc-pVTZ          | -16.6       | -7.9     |
| CCSD(T)/CBS//CCSD/aug-cc-pVTZ          | -12.0       | -3.1     |
| CCSD(T)(FU)/CBS// MP2(FU)/aug-cc-pVTZ  | -3.0        | 5.9      |
| CCSD(T)(FU)/CBS// CCSD(FU)/aug-cc-pVTZ | -11.8       | -2.5     |

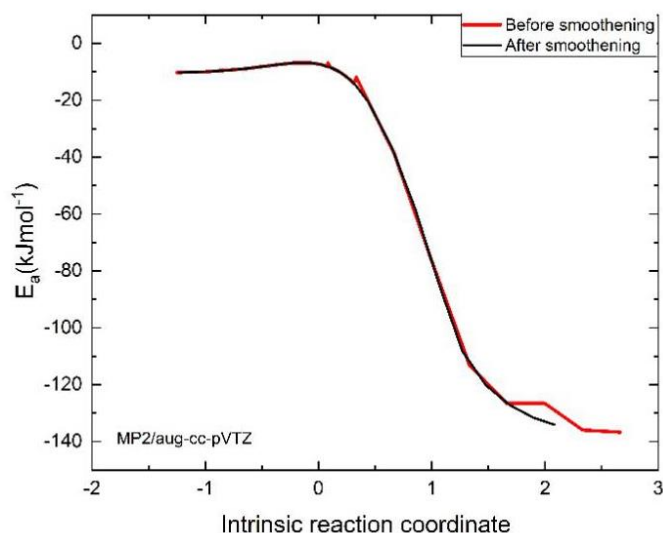

**Fig. S4.** The activation energy variation along the IRC is plotted before and after smoothing computed at MP2(FU)/aug-cc-pVTZ level of theory.

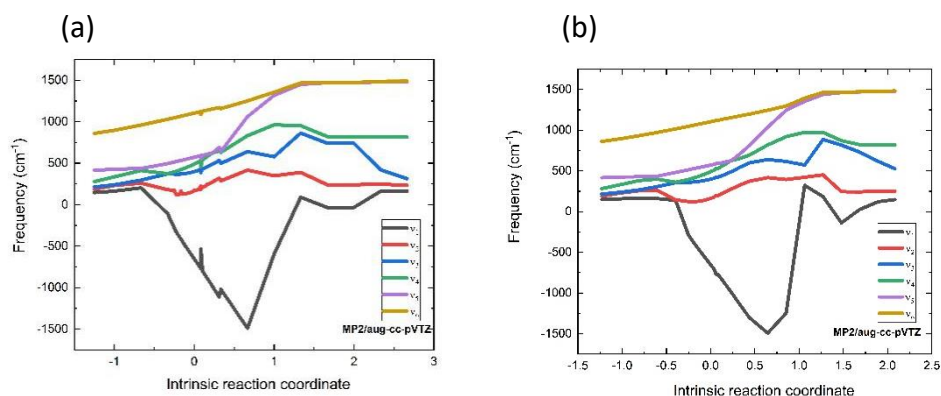

**Fig. S5.** The frequency variation along IRC (a) before and (b) after smoothing. The different modes of frequencies are computed at MP2(FU)/aug-cc-pVTZ level of theory.

**Table S25.** Rate coefficients at different temperature with transition-state theory with and without Wigner-tunneling correction and variational transition-state theory with Wigner-tunneling correction at MP2(FU)/ aug-cc-pVTZ level.

| Temperature (K) | Rate (TST) (cm <sup>3</sup> molec <sup>-1</sup> s <sup>-1</sup> ) | Rate (TST with tunneling) (cm <sup>3</sup> molec <sup>-1</sup> s <sup>-1</sup> ) | Rate (VTST with tunneling) (cm <sup>3</sup> molec <sup>-1</sup> s <sup>-1</sup> ) |
|-----------------|-------------------------------------------------------------------|----------------------------------------------------------------------------------|-----------------------------------------------------------------------------------|
| 10              | 1.98E-12                                                          | 6.92E-10                                                                         | 6.92E-10                                                                          |
| 20              | 4.66E-11                                                          | 4.12E-09                                                                         | 4.08E-10                                                                          |
| 30              | 1.03E-10                                                          | 4.10E-09                                                                         | 8.91E-10                                                                          |
| 40              | 1.35E-10                                                          | 3.08E-09                                                                         | 9.90E-10                                                                          |
| 50              | 1.48E-10                                                          | 2.21E-09                                                                         | 8.98E-10                                                                          |
| 60              | 1.50E-10                                                          | 1.60E-09                                                                         | 7.62E-10                                                                          |
| 70              | 1.47E-10                                                          | 1.19E-09                                                                         | 6.34E-10                                                                          |

|     |          |          |          |
|-----|----------|----------|----------|
| 80  | 1.42E-10 | 9.17E-10 | 5.29E-10 |
| 90  | 1.37E-10 | 7.25E-10 | 4.46E-10 |
| 100 | 1.31E-10 | 5.88E-10 | 3.81E-10 |
| 110 | 1.26E-10 | 4.88E-10 | 3.31E-10 |
| 120 | 1.21E-10 | 4.14E-10 | 2.91E-10 |
| 130 | 1.17E-10 | 3.58E-10 | 2.59E-10 |
| 140 | 1.13E-10 | 3.14E-10 | 2.34E-10 |
| 150 | 1.10E-10 | 2.80E-10 | 2.14E-10 |
| 160 | 1.07E-10 | 2.53E-10 | 1.97E-10 |
| 170 | 1.05E-10 | 2.31E-10 | 1.84E-10 |
| 180 | 1.03E-10 | 2.13E-10 | 1.73E-10 |
| 190 | 1.01E-10 | 1.98E-10 | 1.64E-10 |
| 200 | 9.94E-11 | 1.86E-10 | 1.56E-10 |
| 210 | 9.83E-11 | 1.76E-10 | 1.50E-10 |
| 220 | 9.74E-11 | 1.68E-10 | 1.44E-10 |
| 230 | 9.67E-11 | 1.60E-10 | 1.40E-10 |
| 240 | 9.62E-11 | 1.54E-10 | 1.36E-10 |
| 250 | 9.58E-11 | 1.49E-10 | 1.33E-10 |
| 260 | 9.57E-11 | 1.45E-10 | 1.31E-10 |
| 270 | 9.56E-11 | 1.41E-10 | 1.29E-10 |
| 280 | 9.57E-11 | 1.38E-10 | 1.27E-10 |
| 290 | 9.59E-11 | 1.36E-10 | 1.26E-10 |
| 300 | 9.63E-11 | 1.34E-10 | 1.25E-10 |

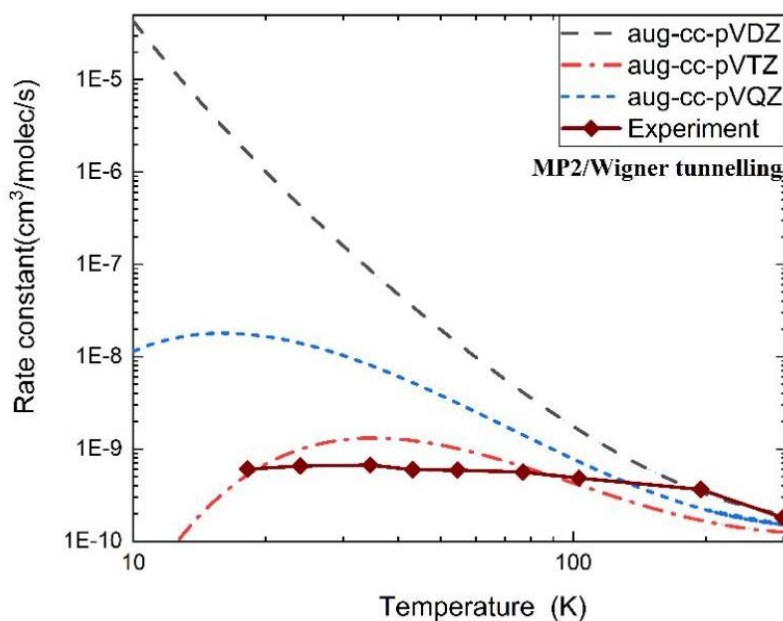

**Fig. S6.** The rate constant variation with temperature at MP2 level of theory with three basis sets are plotted along with the experimental one. The rate constant converges at room temperature irrespective of the basis-set used, but considerably different at lower temperature. The curves follow barrier height order as given in the table S20.

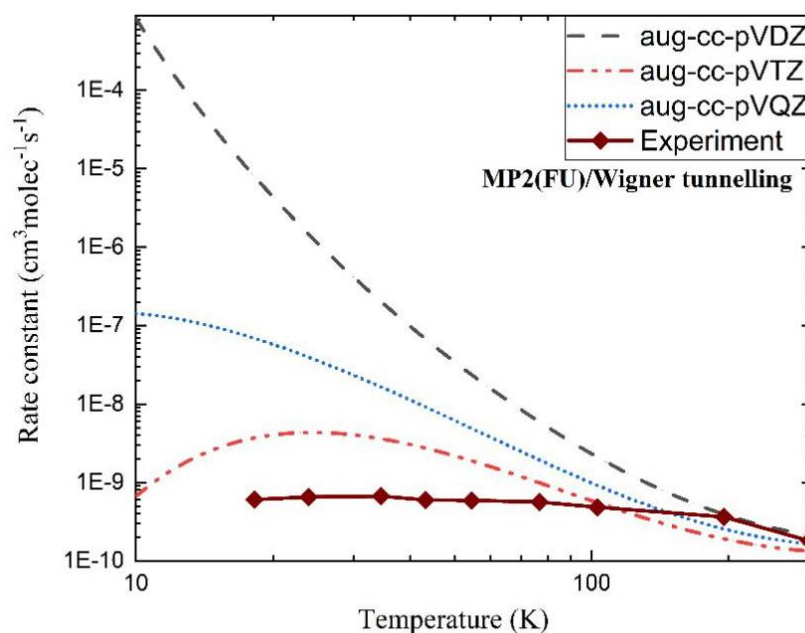

**Fig. S7.** The rate constant variation with temperature at MP2(FU) level of theory in three basis sets are plotted along with the experimental one. The rate constant converges at room temperature irrespective of the basis-set used, but considerably different at lower temperature. Out of the three, aug-cc-pVTZ gives the highest barrier height, then aug-cc-pVQZ and lowest is for aug-cc-pVDZ.

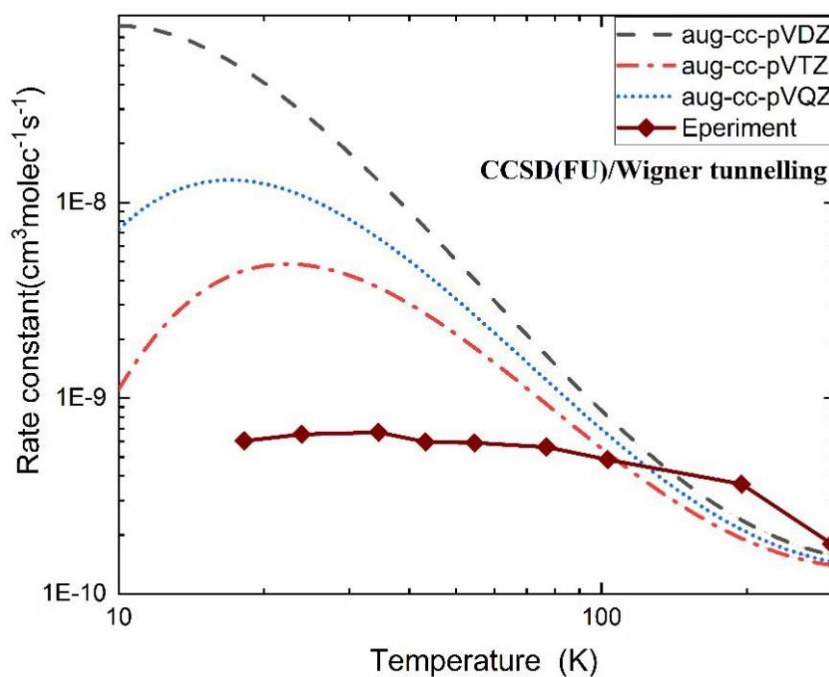

**Fig. S8.** The rate constant variation with temperature at CCSD(FU) level of theory in three basis sets are plotted along with the experimental one. The rate constant converges at room temperature irrespective of the basis-set used, but



considerably different at lower temperature. Here again, the behaviour follows as trend as for MP2 and MP2(FU) calculation.

**Table S26.** The value of vibrational scaling factors used for different levels of theory and corresponding basis set<sup>23</sup>.

| Method             | MP2   | MP2(FU) | CCSD  | CCSD(FU) |
|--------------------|-------|---------|-------|----------|
| <b>aug-cc-pVDZ</b> | 0.959 | 0.969   | 0.963 | --       |
| <b>aug-cc-pVTZ</b> | 0.953 | 0.951   | 0.956 | 0.951    |
| <b>aug-cc-pVQZ</b> | 0.950 | 0.956   | --    | --       |

## References

1. Møller, C.; Plesset, M. S. Note on an approximation treatment for many-electron systems, *Phys. Rev.* **1934**, *46*, 0618-22.
2. Saebø, S.; Almlöf, S. Avoiding the integral storage bottleneck in LCAO calculations of electron correlation, *Chem. Phys. Lett.* **1989**, *154*, 83-89.
3. Head-Gordon, M.; Head-Gordon, T. Analytic MP2 frequencies without Fifth order storage: theory and application to bifurcated hydrogen bonds in the water hexamer, *Chem. Phys. Lett.* **1994**, *220*, 122-28.
4. Head-Gordon, M.; Pople, J. A.; Frisch, M. J. MP2 energy evaluation by direct methods, *Chem. Phys. Lett.*, **1988**, *153*, 503-06.
5. Frisch, M. J.; Head-Gordon, M.; Pople, J. A. Semi-direct algorithms for the MP2 energy and gradient, *Chem. Phys. Lett.* **1990**, *166*, 281-89.
6. Frisch, M. J.; Head-Gordon, M.; Pople, J. A. Direct MP2 gradient method, *Chem. Phys. Lett.* **1990**, *166*, 275-80.
7. Scuseria, G. E.; Schaefer III, H. F. Is coupled cluster singles and doubles (CCSD) more computationally intensive than quadratic configuration-interaction (QCISD)? *J. Chem. Phys.* **1989**, *90*, 3700-03.
8. Scuseria, G. E.; Janssen, C. L.; Schaefer III, H. F. An efficient reformulation of the closed-shell coupled cluster single and double excitation (CCSD) equations, *J. Chem. Phys.* **1988**, *89*, 7382-87.
9. Purvis III, G. D. ; Bartlett, R. J. A full coupled-cluster singles and doubles model – the inclusion of disconnected triples, *J. Chem. Phys.* **1982**, *76*, 1910-18.
10. Čížek, J.; In *Advances in Chemical Physics*; Hariharan, P. C., Ed.; Wiley Interscience, New York, **1969** , Vol. 14, 35.
11. Gimme, S. Semiempirical Hybrid Density Functional with Perturbative Second-Order Correlation. *J. Chem. Phys.* **2006**, *124* (3), 034108.
12. Becke, A. D. Density-functional exchange-energy approximation with correct asymptotic behavior. *Phys. Rev. A Gen. Phys.* **1988**, *38* (6), 3098-3100.
13. Lee, C.; Yang, W.; Parr, R. G. Development of the Colle-Salvetti correlation-energy formula into a functional of the electron density. *Phys. Rev. B Condens. Matter* **1988**, *37* (2), 785-789.

14. Zhao Y.; Truhlar, D. G. The M06 suite of density functionals for main group thermochemistry, thermochemical kinetics, noncovalent interactions, excited states, and transition elements: two new functionals and systematic testing of four M06-class functionals and 12 other functionals. *Theor. Chem. Acc.* **2008**, *120* (1), 215–241.
15. Chai, J. D.; Head-Gordon, M. Long-range corrected hybrid density functionals with damped atom-atom dispersion corrections. *Phys. Chem. Chem. Phys.* **2008**, *10* (44), 6615–6620.
16. Kendall, R. A.; Dunning Jr., T. H.; Harrison, R. J. Electron affinities of the first-row atoms revisited. Systematic basis sets and wave functions, *J. Chem. Phys.* **1992**, *96*, 6796–806.
17. Dunning Jr., T. H. Gaussian basis sets for use in correlated molecular calculations. I. The atoms boron through neon and hydrogen, *J. Chem. Phys.* **1989**, *90*, 1007–23.
18. Woon, D. E.; Dunning Jr., T. H. Gaussian-basis sets for use in correlated molecular calculations. 3. The atoms aluminum through argon, *J. Chem. Phys.* **1993**, *98*, 1358–71.
19. Chai, J.D.; Head-Gordon, M. Long-range corrected hybrid density functionals with damped atom-atom dispersion corrections, *Phys. Chem. Chem. Phys.* **2008**, *10*, 6615–6620.
20. Peterson, K. A.; Woon, D. E.; Dunning Jr., T. H. Benchmark calculations with correlated molecular wave functions. IV. The classical barrier height of the  $\text{H}+\text{H}_2 \rightarrow \text{H}_2+\text{H}$  reaction, *J. Chem. Phys.* **1994**, *100*, 7410–15.
21. Purvis III, G. D.; Bartlett, R. J. A full coupled-cluster singles and doubles model – the inclusion of disconnected triples, *J. Chem. Phys.* **1982**, *76*, 1910–18.
22. Pople, J. A.; Head-Gordon, M. ; Raghavachari, K. Quadratic configuration interaction – a general technique for determining electron correlation energies, *J. Chem. Phys.* **1987**, *87*, 5968–75.
23. Johnson III, R. D. NIST Computational Chemistry Comparison and Benchmark Database. *NIST Standard Reference Database Number 101*, 2019.
